# Supplementary material for: Effects of germination season on life history traits and on transgenerational plasticity in seed dormancy in a cold desert annual
Source: PubMed Central journal article supplement (PMC4846867; doi:10.1038/srep25076), 2016-04-27
Supplement: srep25076-s1.pdf [file srep25076-s1.pdf]

**Effects of germination season on life history traits and on  
transgenerational plasticity in seed dormancy in a cold desert annual**

Juan J. Lu<sup>1</sup>, Dun Y. Tan<sup>1</sup>, Carol C. Baskin<sup>1,2,3</sup> & Jerry M. Baskin<sup>1,2</sup>

**Supplementary Table S1. Effect of germination season/watering regime on phenology, morphology and silicle production of plants in *Isatis violascens* (mean  $\pm$  1 s.e.).** A one-way ANCOVA was used to test significant differences between autumn- and spring-germinating plants. H, plant height at maturity; l, post-germination life period. Dates for emergence, flowering and fruiting are number of days (d) since sowing; flowering interval, interval from blooming of first flower to withering of last flower; and post-germination life span, interval from emergence to death.

|                                          | Autumn-germinating plants       | Spring-germinating plants      |
|------------------------------------------|---------------------------------|--------------------------------|
| <b>Phenology</b>                         |                                 |                                |
| Emergence date (d)                       | 37.75 $\pm$ 0.54 <sup>a</sup>   | 211.53 $\pm$ 1.01 <sup>b</sup> |
| Flowering date (d)                       | 246.81 $\pm$ 1.76 <sup>a</sup>  | 250.73 $\pm$ 2.47 <sup>a</sup> |
| Fruiting date (d)                        | 254.31 $\pm$ 2.14 <sup>a</sup>  | 257.57 $\pm$ 2.44 <sup>a</sup> |
| Flowering period (d)                     | 39.00 $\pm$ 0.97 <sup>b</sup>   | 33.00 $\pm$ 0.33 <sup>a</sup>  |
| Post-germination life span (l, d)        | 231.13 $\pm$ 1.88 <sup>b</sup>  | 70.97 $\pm$ 0.51 <sup>a</sup>  |
| <b>Morphology</b>                        |                                 |                                |
| Plant height at maturity (H, cm)         | 66.18 $\pm$ 1.82 <sup>b</sup>   | 49.22 $\pm$ 1.23 <sup>a</sup>  |
| <b>Silicle production per individual</b> |                                 |                                |
| Number of infructescences                | 21.69 $\pm$ 2.80 <sup>b</sup>   | 4.87 $\pm$ 0.63 <sup>a</sup>   |
| Number of silicles                       | 174.38 $\pm$ 11.35 <sup>b</sup> | 51.97 $\pm$ 3.87 <sup>a</sup>  |

**Supplementary Table S2.** Pearson correlations among characters for AP and SP plants in *Isatis violascens*. N = 180. \*  $P < 0.05$ ; \*\*  $P < 0.01$ ; \*\*\*  $P < 0.001$ .

|                                   | Emergence date | Flowering date | Fruiting date | Maturation date | Flowering period | Fruiting period | Growth period | Post-germination life span | Plant height at maturity | Number of branches | Height growth rate per week | Number of infructescences | Number of silicles per individual | Dry mass of root | Dry mass of stem | Dry mass of leaf | Dry mass of silicle | Dry mass of plant | Dry mass allocation to root | Dry mass allocation to stem | Dry mass allocation to leaf | Dry mass allocation to silicle |
|-----------------------------------|----------------|----------------|---------------|-----------------|------------------|-----------------|---------------|----------------------------|--------------------------|--------------------|-----------------------------|---------------------------|-----------------------------------|------------------|------------------|------------------|---------------------|-------------------|-----------------------------|-----------------------------|-----------------------------|--------------------------------|
| Emergence date                    | 1.00           |                |               |                 |                  |                 |               |                            |                          |                    |                             |                           |                                   |                  |                  |                  |                     |                   |                             |                             |                             |                                |
| Flowering date                    | 0.14           | 1.00           |               |                 |                  |                 |               |                            |                          |                    |                             |                           |                                   |                  |                  |                  |                     |                   |                             |                             |                             |                                |
| Fruiting date                     | 0.15           | 0.62***        | 1.00          |                 |                  |                 |               |                            |                          |                    |                             |                           |                                   |                  |                  |                  |                     |                   |                             |                             |                             |                                |
| Maturation date                   | 0.07           | 0.52***        | 0.90***       | 1.00            |                  |                 |               |                            |                          |                    |                             |                           |                                   |                  |                  |                  |                     |                   |                             |                             |                             |                                |
| Flowering period                  | -0.70***       | -0.1           | -0.1          | -0.05           | 1.00             |                 |               |                            |                          |                    |                             |                           |                                   |                  |                  |                  |                     |                   |                             |                             |                             |                                |
| Fruiting period                   | -0.52***       | -0.26          | -0.30*        | -0.31*          | 0.59***          | 1.00            |               |                            |                          |                    |                             |                           |                                   |                  |                  |                  |                     |                   |                             |                             |                             |                                |
| Growth period                     | -0.81***       | 0.33*          | 0.17          | 0.2             | 0.66***          | 0.40**          | 1.00          |                            |                          |                    |                             |                           |                                   |                  |                  |                  |                     |                   |                             |                             |                             |                                |
| Post-germination life span        | -0.57***       | -0.14          | -0.23         | -0.14           | 0.59***          | 0.53***         | 0.65***       | 1.00                       |                          |                    |                             |                           |                                   |                  |                  |                  |                     |                   |                             |                             |                             |                                |
| Plant height at maturity          | -0.59***       | -0.13          | -0.16         | -0.05           | 0.52***          | 0.24            | 0.64***       | 0.54***                    | 1.00                     |                    |                             |                           |                                   |                  |                  |                  |                     |                   |                             |                             |                             |                                |
| Number of branches                | -0.73***       | -0.15          | -0.15         | -0.06           | 0.62***          | 0.47**          | 0.75***       | 0.77***                    | 0.75***                  | 1.00               |                             |                           |                                   |                  |                  |                  |                     |                   |                             |                             |                             |                                |
| Height growth rate per week       | 0.65***        | 0.15           | 0.15          | 0.1             | -0.59***         | -0.59***        | -0.66***      | -0.83***                   | -0.24                    | -0.65***           | 1.00                        |                           |                                   |                  |                  |                  |                     |                   |                             |                             |                             |                                |
| Number of infructescences         | -0.69***       | -0.22          | -0.19         | -0.07           | 0.58***          | 0.45**          | 0.67***       | 0.61***                    | 0.74***                  | 0.80***            | -0.55***                    | 1.00                      |                                   |                  |                  |                  |                     |                   |                             |                             |                             |                                |
| Number of silicles per individual | -0.59***       | -0.16          | -0.09         | -0.04           | 0.51***          | 0.39**          | 0.65***       | 0.69***                    | 0.71***                  | 0.77***            | -0.60***                    | 0.66***                   | 1.00                              |                  |                  |                  |                     |                   |                             |                             |                             |                                |
| Dry mass of root                  | -0.75***       | -0.15          | -0.07         | 0.04            | 0.62***          | 0.48**          | 0.73***       | 0.62***                    | 0.74***                  | 0.73***            | -0.56***                    | 0.73***                   | 0.75***                           | 1.00             |                  |                  |                     |                   |                             |                             |                             |                                |
| Dry mass of stem                  | -0.66***       | -0.17          | -0.13         | -0.08           | 0.60***          | 0.53***         | 0.70***       | 0.81***                    | 0.69***                  | 0.85***            | -0.67***                    | 0.73***                   | 0.76***                           | 0.76***          | 1.00             |                  |                     |                   |                             |                             |                             |                                |
| Dry mass of leaf                  | -0.77***       | -0.19          | -0.21         | -0.15           | 0.68***          | 0.52***         | 0.71***       | 0.64***                    | 0.58***                  | 0.73***            | -0.67***                    | 0.63***                   | 0.60***                           | 0.68***          | 0.66***          | 1.00             |                     |                   |                             |                             |                             |                                |
| Dry mass of silicle               | -0.60***       | -0.13          | -0.06         | -0.02           | 0.53***          | 0.40**          | 0.67***       | 0.67***                    | 0.68***                  | 0.78***            | -0.61***                    | 0.68***                   | 0.96***                           | 0.78***          | 0.77***          | 0.58***          | 1.00                |                   |                             |                             |                             |                                |
| Dry mass of plant                 | -0.66***       | -0.14          | -0.12         | -0.05           | 0.58***          | 0.47**          | 0.70***       | 0.67***                    | 0.74***                  | 0.82***            | -0.58***                    | 0.75***                   | 0.91***                           | 0.85***          | 0.85***          | 0.69***          | 0.95***             | 1.00              |                             |                             |                             |                                |
| Dry mass allocation to root       | -0.2           | 0              | 0.19          | 0.25            | 0.08             | 0.08            | 0.15          | -0.04                      | 0.26                     | 0                  | 0.1                         | 0.17                      | 0.02                              | 0.55***          | 0.14             | 0.01             | 0.05                | 0.14              | 1.00                        |                             |                             |                                |
| Dry mass allocation to stem       | -0.23          | -0.17          | -0.07         | -0.03           | 0.22             | 0.29            | 0.23          | 0.46**                     | 0.25                     | 0.34*              | -0.33*                      | 0.29*                     | 0.11                              | 0.27             | 0.59***          | 0.14             | 0.08                | 0.17              | 0.25                        | 1.00                        |                             |                                |
| Dry mass allocation to leaf       | -0.69***       | -0.26          | -0.32*        | -0.23           | 0.61***          | 0.48**          | 0.58***       | 0.54***                    | 0.44**                   | 0.59***            | -0.65***                    | 0.57***                   | 0.39**                            | 0.50***          | 0.47**           | 0.90***          | 0.34*               | 0.44**            | -0.08                       | 0.13                        | 1.00                        |                                |
| Dry mass allocation to silicle    | 0.76***        | 0.18           | 0.21          | 0.12            | -0.65***         | -0.54***        | -0.68***      | -0.63***                   | -0.50***                 | -0.68***           | 0.68***                     | -0.63***                  | -0.37*                            | -0.61***         | -0.65***         | -0.87***         | -0.34*              | -0.49**           | -0.12                       | -0.43**                     | -0.92***                    | 1.00                           |
